# Supplementary material
Source: PubMed Central journal article supplement (PMC3022516)

**A**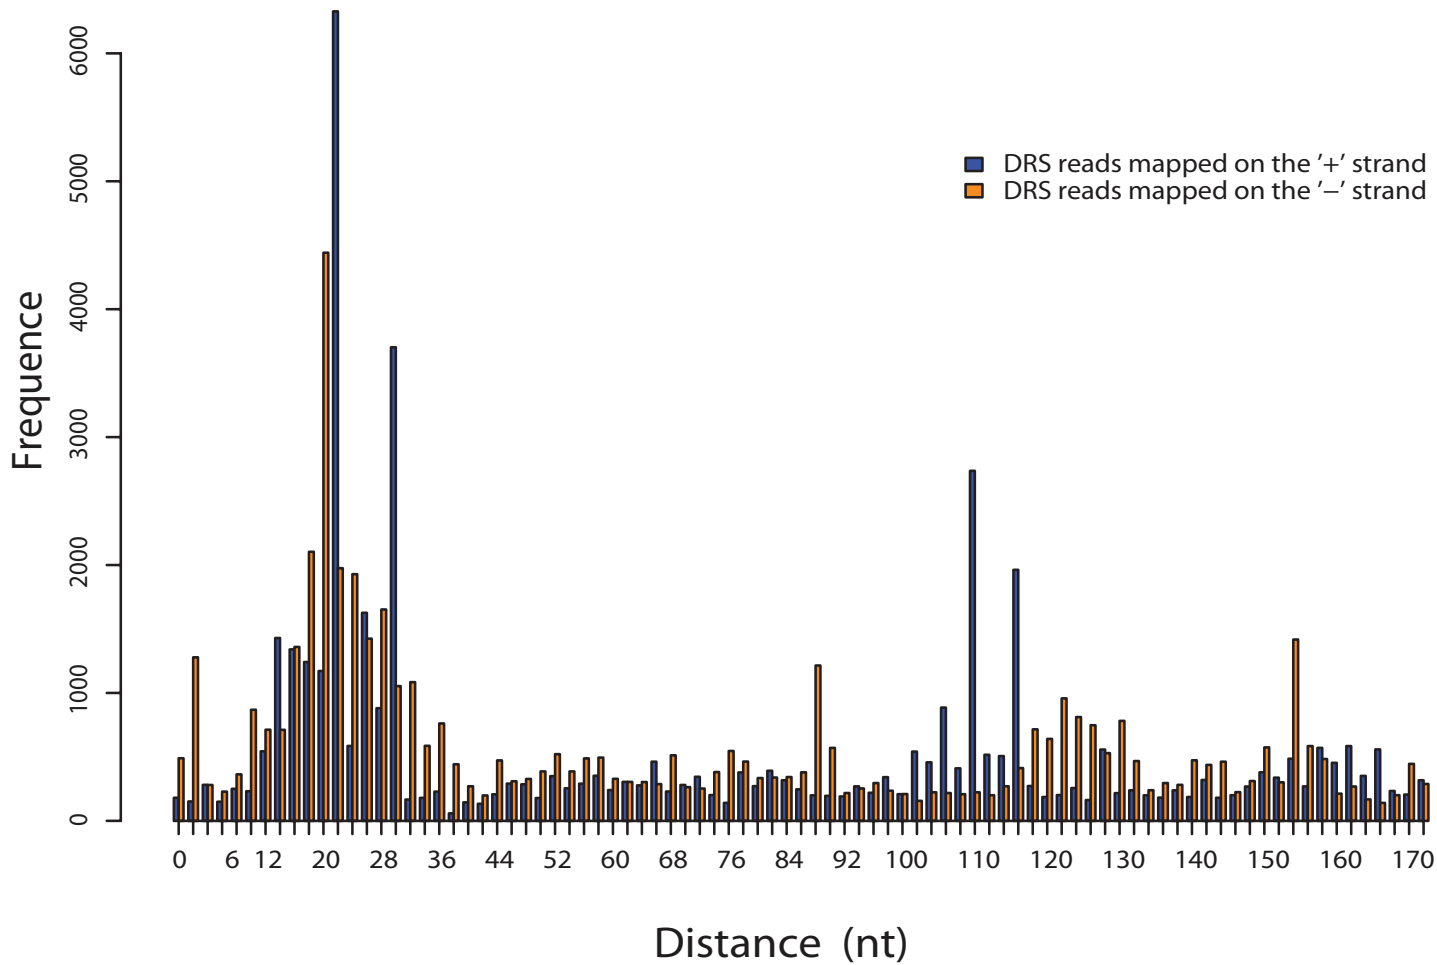**B**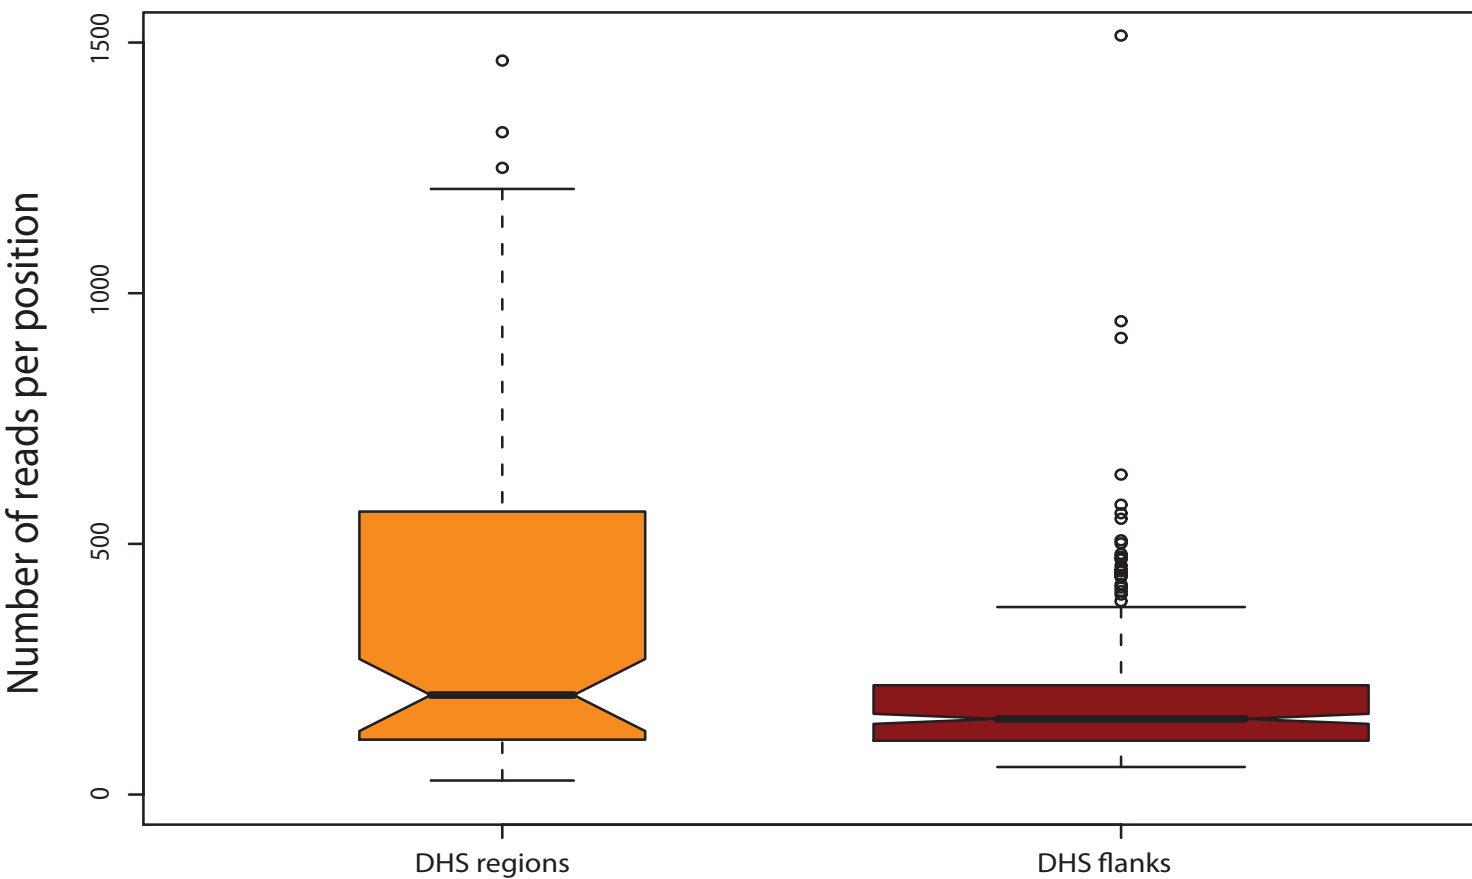

**A**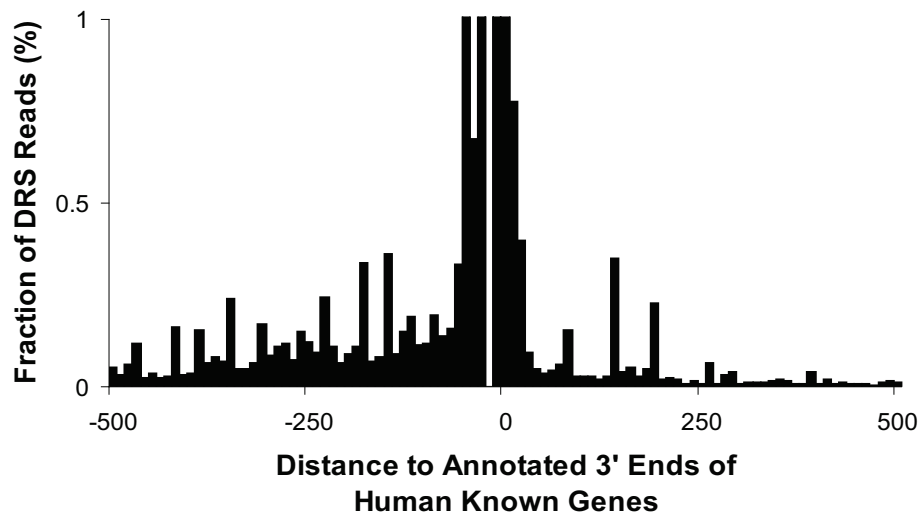**B**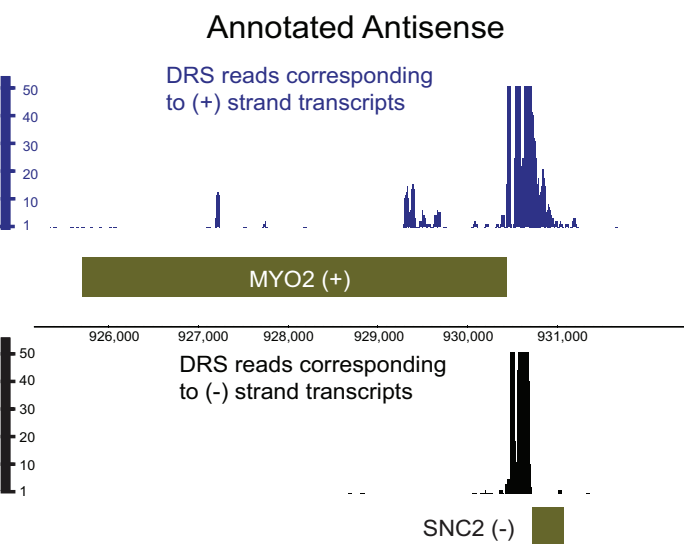**C**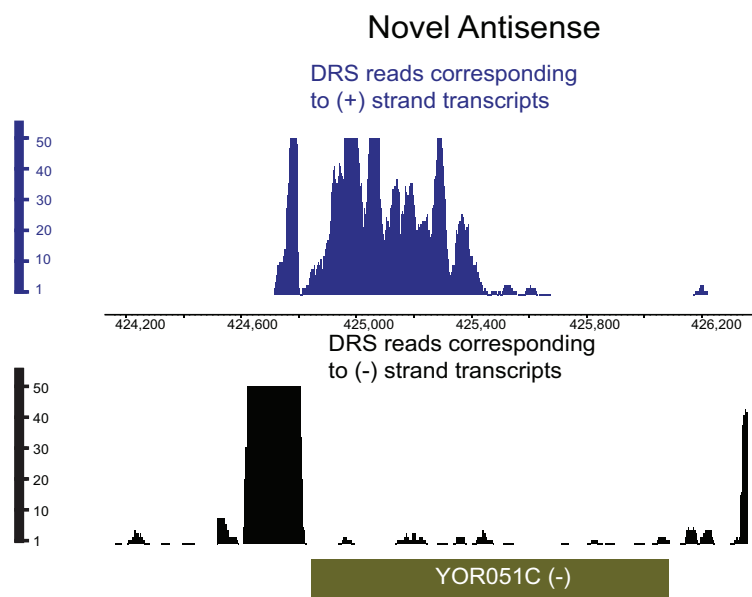**D**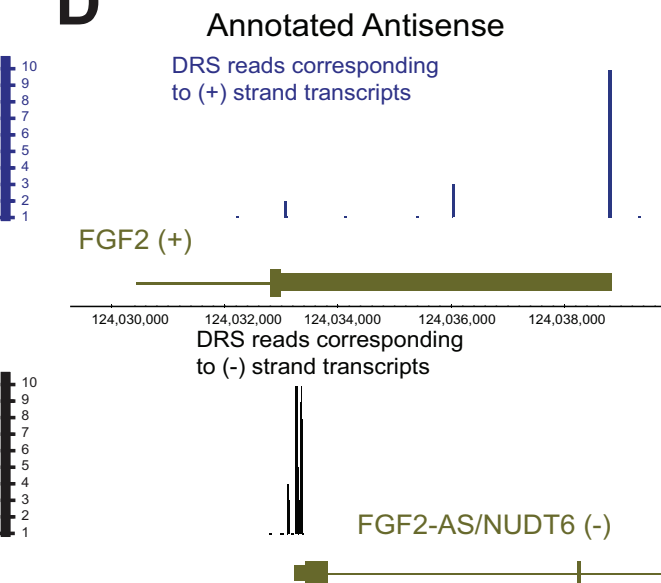**E**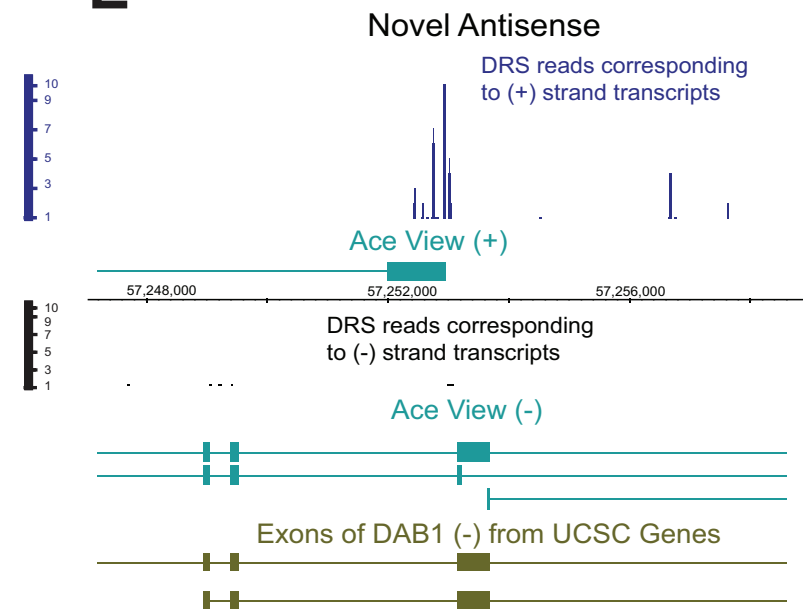

Supplemental Figure 4

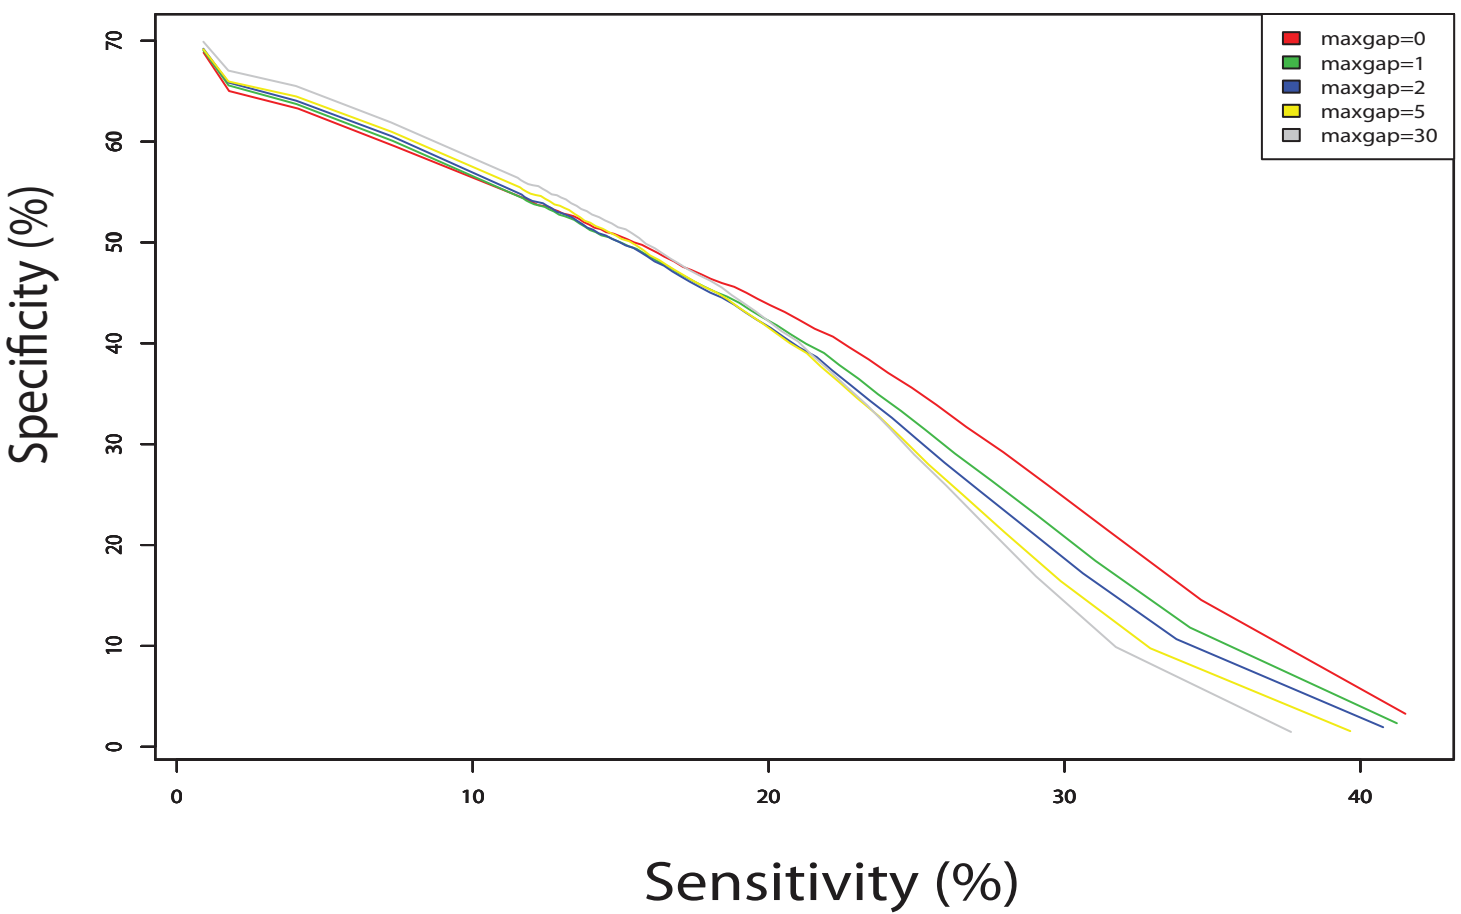

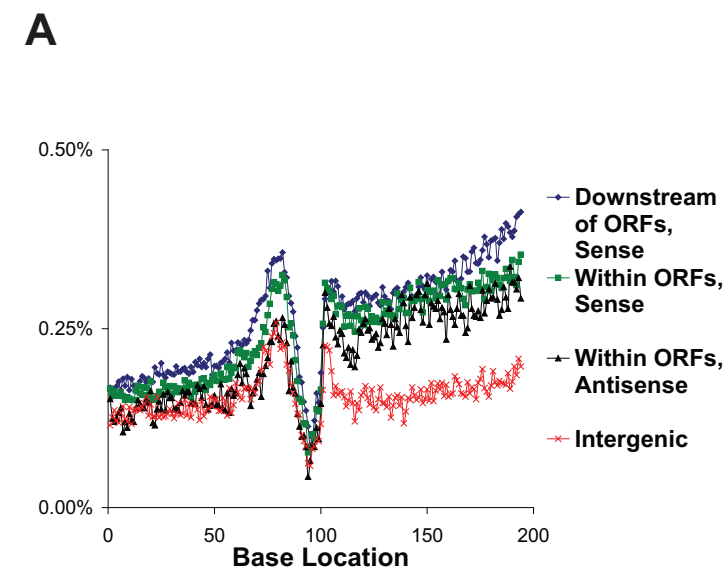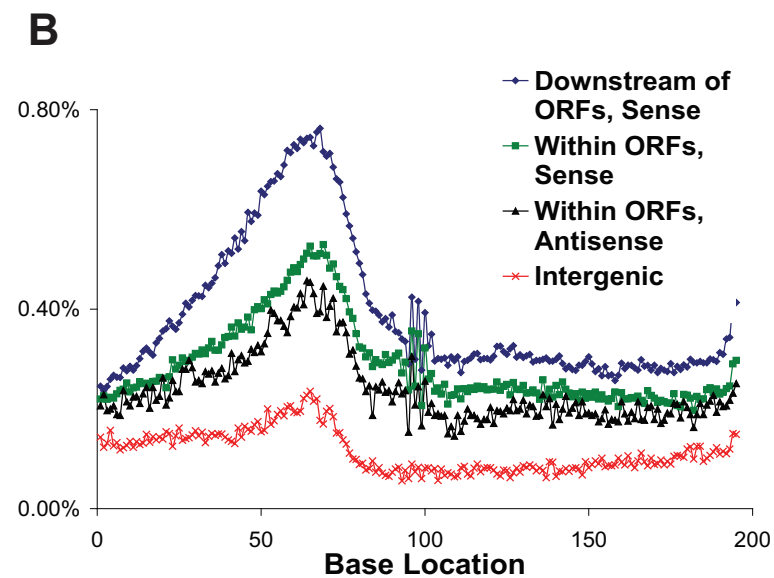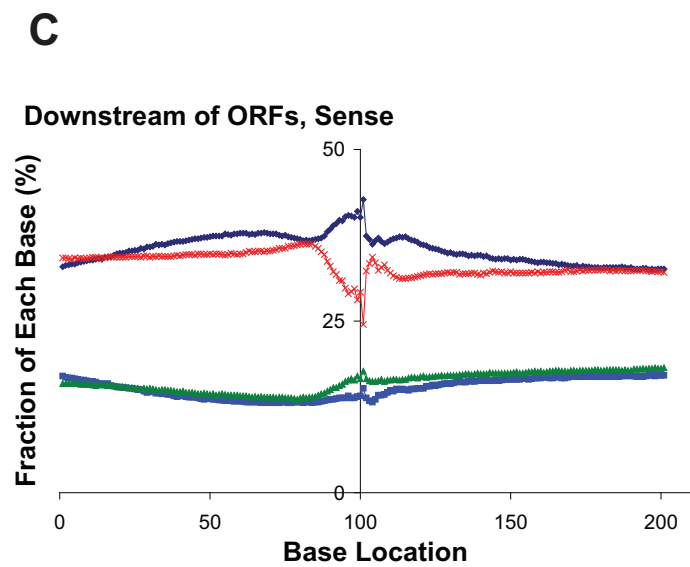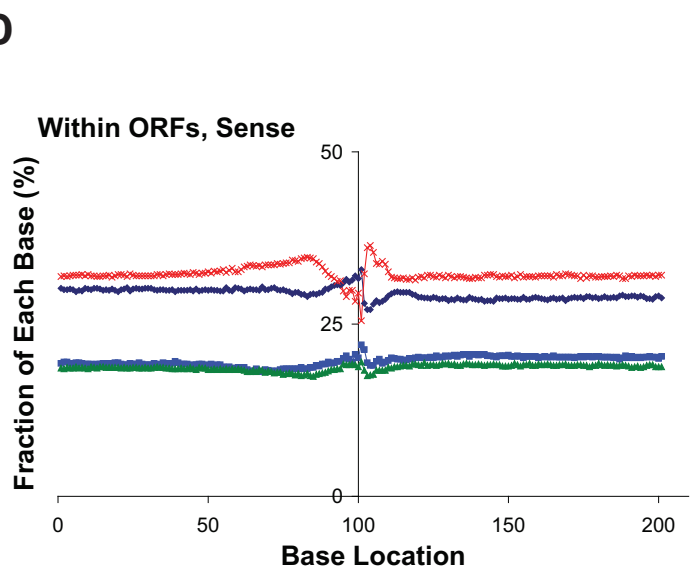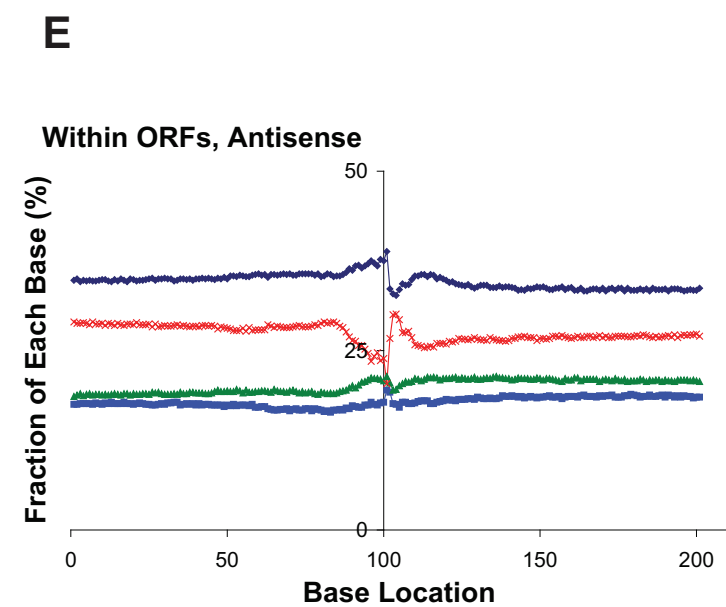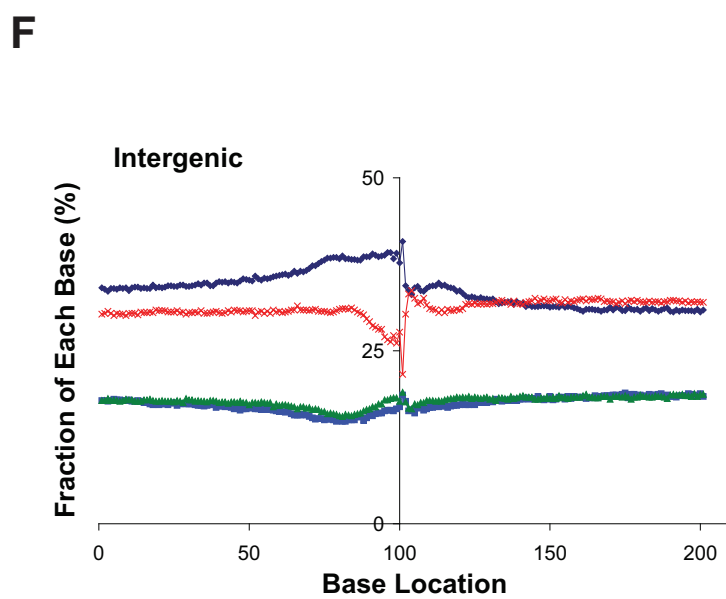

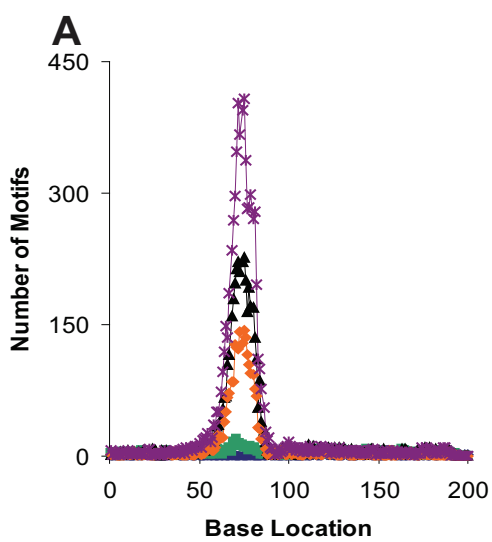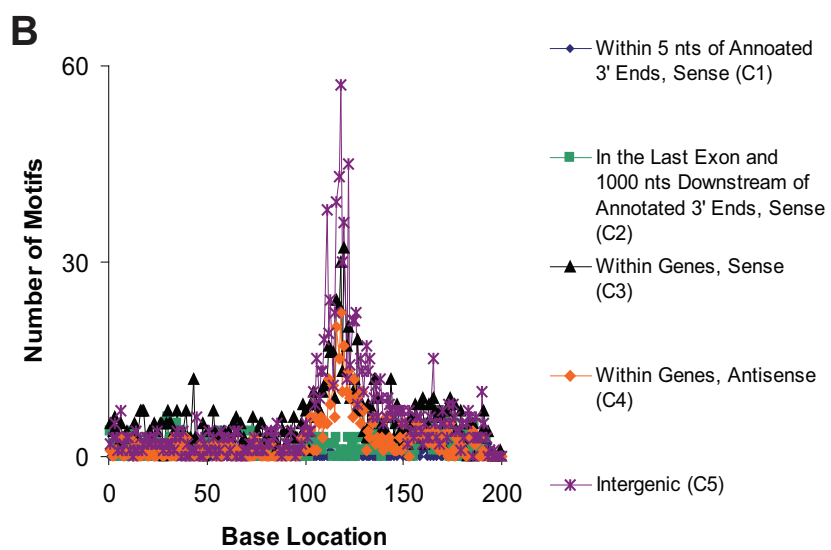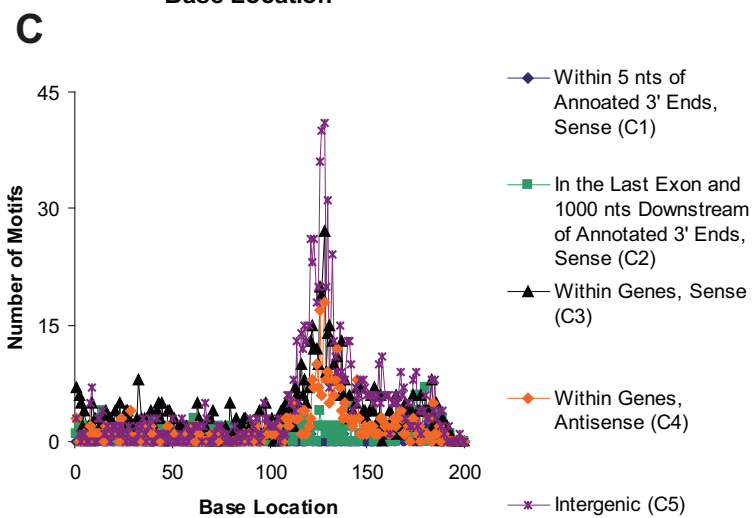

Supplement: NIHMS256395-supplement-02.pdf [file NIHMS256395-supplement-02.pdf]
